# Supplementary material for: Optimal design of a coupled photovoltaic–electrolysis-battery system for hydrogen generation
Source: Royal Society of Chemistry journal article supplement (doi:10.1039/d2se01555b), 2023-01-01
Supplement: d2se01555b1.pdf [file d2se01555b1.pdf]

# Optimal Design of a Coupled Photovoltaic-Electrolysis-Battery System for Hydrogen Generation

Aisha Alobaid<sup>\*a,b</sup> and Raymond A. Adomaitis<sup>a</sup>

<sup>a</sup>Department of Chemical and Biomolecular Engineering, Institute for Systems Research, University of Maryland, College Park, MD, 20742, USA

<sup>b</sup>Chemical Engineering Department, College of Engineering and Petroleum, Kuwait University, 13060, Kuwait

## Supplementary Material

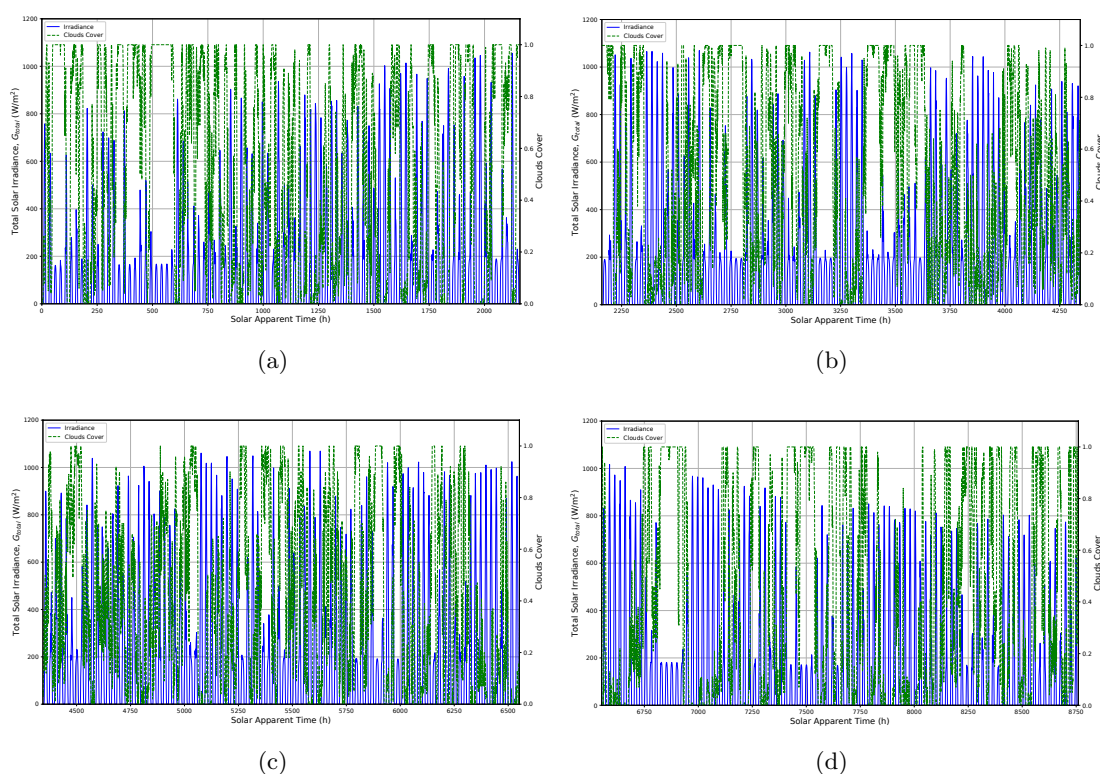

Fig. S1. Hourly cloud cover data from Dark Sky API for College Park, MD and the solar irradiance  $G_{\text{total}}$  calculated at a module tilt angle of  $35^\circ$  for the year 2017, divided into 4 periods: January, February, March (a) April, May, June (b), July, August, September (c), and October, November, December (d).

\*Corresponding author

Email: aisha.alobaid@ku.edu.kw

Address: Chemical Engineering Department, College of Engineering and Petroleum, Kuwait University, P.O.Box 5969, Safat, 13060, Kuwait

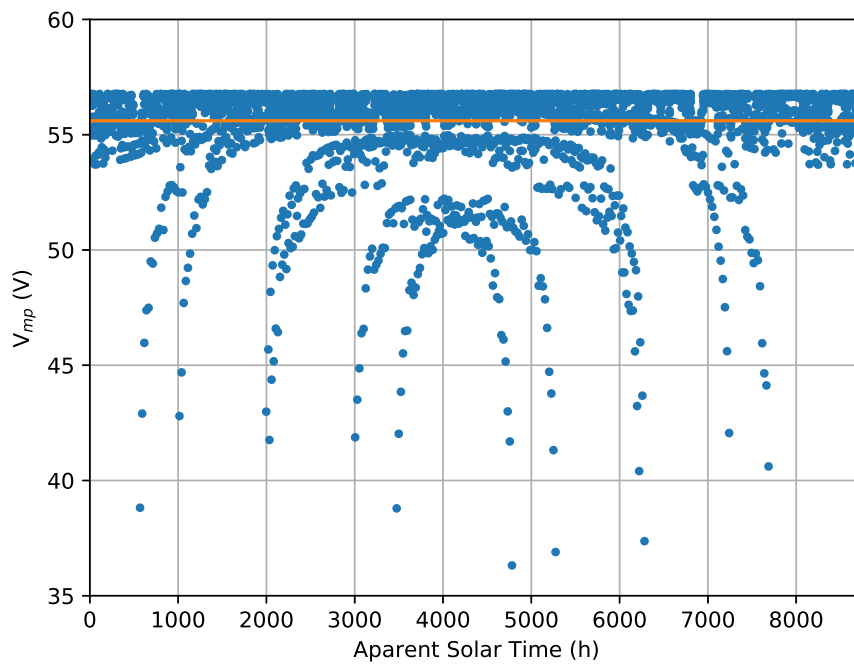

Fig. S2. Non-zero values of the  $V_{mp}$  (i.e., during daylight operation of the PV module), with the mean value calculated.

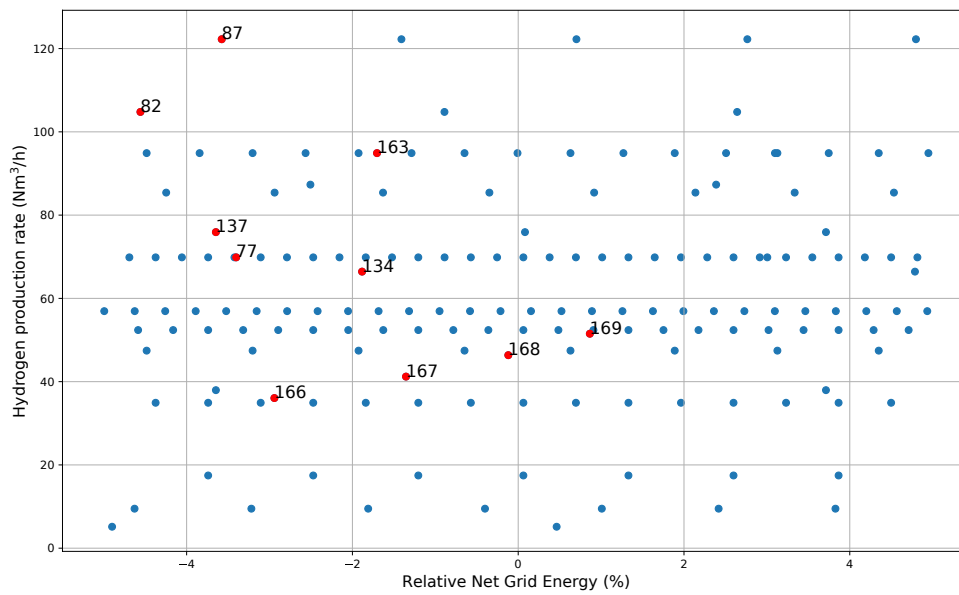

Fig. S3. Hydrogen production rate and the relative net grid energy, showing the 10 Pareto-Frontier points in red.

Table S1. A list of the input parameters and variables used in the model

| Input Parameters          |                                                                                      | Output                                                                                                                                                                                                                                                                                                                                            |
|---------------------------|--------------------------------------------------------------------------------------|---------------------------------------------------------------------------------------------------------------------------------------------------------------------------------------------------------------------------------------------------------------------------------------------------------------------------------------------------|
| Solar Irradiance Modeling |                                                                                      |                                                                                                                                                                                                                                                                                                                                                   |
| $G_{sc} = 1366$           | The solar constant ( $\text{W}/\text{m}^2$ )                                         | <ul style="list-style-type: none"> <li>• The Global irradiance <math>G_G</math> (<math>\text{W}/\text{m}^2</math>), Equation (13)</li> <li>• The total solar irradiance <math>G_{total}</math> (<math>\text{W}/\text{m}^2</math>), Equation (15)</li> </ul>                                                                                       |
| $\delta = 23.44^\circ$    | Earth's declination at $t_d = 0$                                                     |                                                                                                                                                                                                                                                                                                                                                   |
| $n_{ast} = 24$            | Number of intervals within a day                                                     |                                                                                                                                                                                                                                                                                                                                                   |
| $i$                       | Index in range $n_{ast}$ ( $i = 0$ to $n_{ast} - 1$ ) defines the time of the day    |                                                                                                                                                                                                                                                                                                                                                   |
| $\phi$                    | Latitude measured north of the equator ( $^\circ$ )                                  |                                                                                                                                                                                                                                                                                                                                                   |
| $z$                       | Site elevation (km)                                                                  |                                                                                                                                                                                                                                                                                                                                                   |
| $\theta_{tilt}$           | PV module tilt angle ( $^\circ$ )                                                    |                                                                                                                                                                                                                                                                                                                                                   |
| $CloudsCover$             | Clouds cover (fraction between 0 and 1)                                              |                                                                                                                                                                                                                                                                                                                                                   |
| PV Module                 |                                                                                      |                                                                                                                                                                                                                                                                                                                                                   |
| $I_{ph}$                  | Photo-current (A)                                                                    | <ul style="list-style-type: none"> <li>• PV module operating current <math>I</math>, Equation (16)</li> <li>• PV modules power <math>P_{pv}</math> (kW), <math>P_{pv} = M_{pv} \times I_{mp} \times V_{mp}</math></li> </ul>                                                                                                                      |
| $I_o$                     | Dark saturation current (A)                                                          |                                                                                                                                                                                                                                                                                                                                                   |
| $R_s$                     | Series resistance ( $\Omega$ )                                                       |                                                                                                                                                                                                                                                                                                                                                   |
| $R_{sh}$                  | Shunt resistance ( $\Omega$ )                                                        |                                                                                                                                                                                                                                                                                                                                                   |
| $\beta$                   | Diode ideality factor                                                                |                                                                                                                                                                                                                                                                                                                                                   |
| $X(t)$                    | Dimensionless concentration factor proportional to the global irradiance at time $t$ |                                                                                                                                                                                                                                                                                                                                                   |
| $V$                       | PV module operating voltage (V)                                                      |                                                                                                                                                                                                                                                                                                                                                   |
| $M_{pv}$                  | Number of PV modules connected in parallel                                           |                                                                                                                                                                                                                                                                                                                                                   |
| Electrolyzer              |                                                                                      |                                                                                                                                                                                                                                                                                                                                                   |
| $N$                       | Number of cells connected in series                                                  | <ul style="list-style-type: none"> <li>• Electrolysis Cell current <math>I_{cell}</math> (<math>\text{mA}/\text{cm}^2</math>), Equation (17) and Fig. 4</li> <li>• Electrolyzer Power <math>P_e</math> (kW), Equation (18)</li> <li>• Hydrogen Production rate <math>V_{H_2}</math> (<math>\text{Nm}^3/\text{h}</math>), Equation (20)</li> </ul> |
| $M$                       | Number of electrolysis stacks connected in parallel                                  |                                                                                                                                                                                                                                                                                                                                                   |
| $V_{cell}$                | Electrolysis cell voltage (V), $V_{cell} = V_{mp}/N$                                 |                                                                                                                                                                                                                                                                                                                                                   |
| Battery                   |                                                                                      |                                                                                                                                                                                                                                                                                                                                                   |
| $\eta_b$                  | Battery round-trip efficiency (%)                                                    | <ul style="list-style-type: none"> <li>• Battery Energy <math>E_b</math> (kWh), Equation (21)</li> <li>• Battery state of charge <math>SOC</math>, Equation (22)</li> </ul>                                                                                                                                                                       |
| $Cap$                     | Battery capacity (kWh)                                                               |                                                                                                                                                                                                                                                                                                                                                   |
| $P_{pv}$                  | PV modules power (kW)                                                                |                                                                                                                                                                                                                                                                                                                                                   |
| $P_e$                     | Power of the Electrolyzer (kW)                                                       |                                                                                                                                                                                                                                                                                                                                                   |
| Economic Model            |                                                                                      |                                                                                                                                                                                                                                                                                                                                                   |
| $U_j$                     | Unit $j$ capital cost ( $\$/\text{kW}$ )                                             | <ul style="list-style-type: none"> <li>• Annual cost of the system <math>ACS</math> (<math>\\$/\text{yr}</math>), Equation (23)</li> <li>• Levelized cost of energy <math>LCE</math> (<math>\\$/\text{kWh}</math>), Equation (38)</li> </ul>                                                                                                      |
| $U_{O\&M,j}$              | Unit $j$ O&M cost ( $\$/\text{kW}$ )                                                 |                                                                                                                                                                                                                                                                                                                                                   |
| $P_j$                     | Power produced or consumed (kW) in unit $j$                                          |                                                                                                                                                                                                                                                                                                                                                   |
| $n_j$                     | Lifetime of the $j^{th}$ component (years)                                           |                                                                                                                                                                                                                                                                                                                                                   |
| $i$                       | Real discount rate                                                                   |                                                                                                                                                                                                                                                                                                                                                   |
| $RF$                      | Replacement cost factor                                                              |                                                                                                                                                                                                                                                                                                                                                   |
| $NGE$                     | Net grid energy (kWh)                                                                |                                                                                                                                                                                                                                                                                                                                                   |
| $E_{an}$                  | Annual energy produced by the PV system ( $\text{kWh}/\text{yr}$ )                   |                                                                                                                                                                                                                                                                                                                                                   |

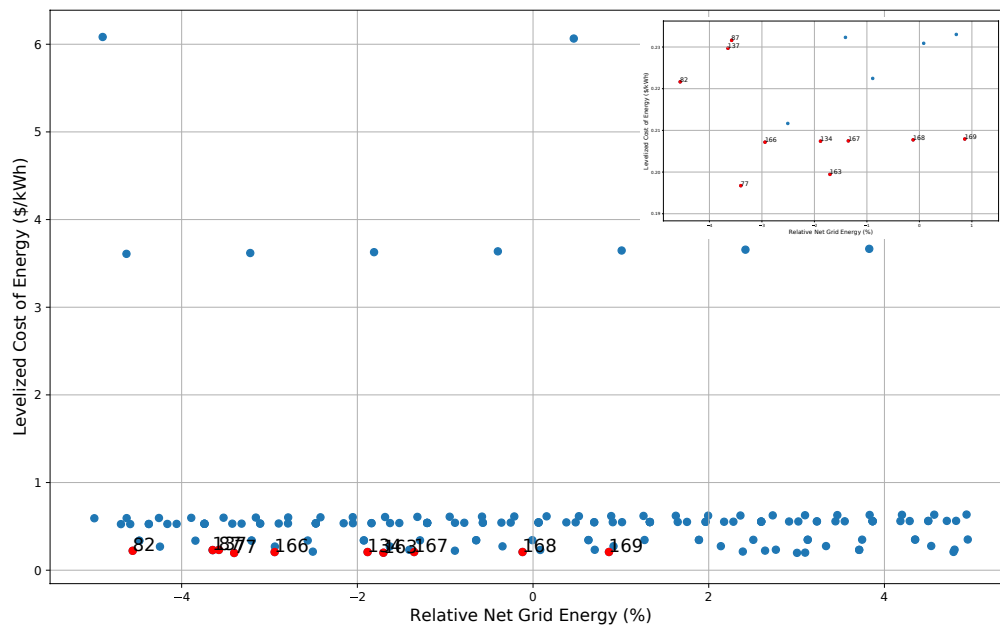

Fig. S4. LCE and the relative net grid energy, showing the 10 Pareto-Frontier points in red.

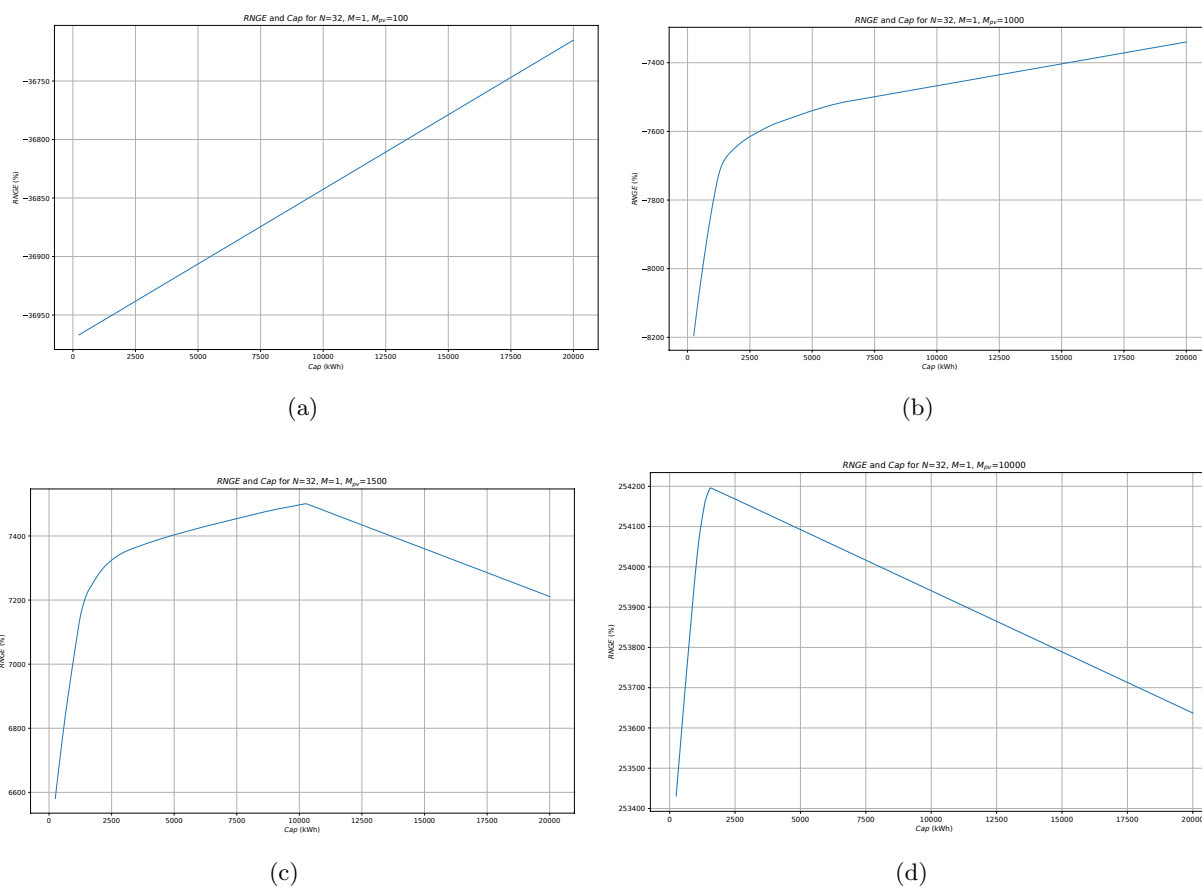

Fig. S5. Effect of changing the battery capacity at fixed system design, for  $M_{pv}$  of 100 (a), 1,000 (b), 1,500 (c), and 10,000 (d).

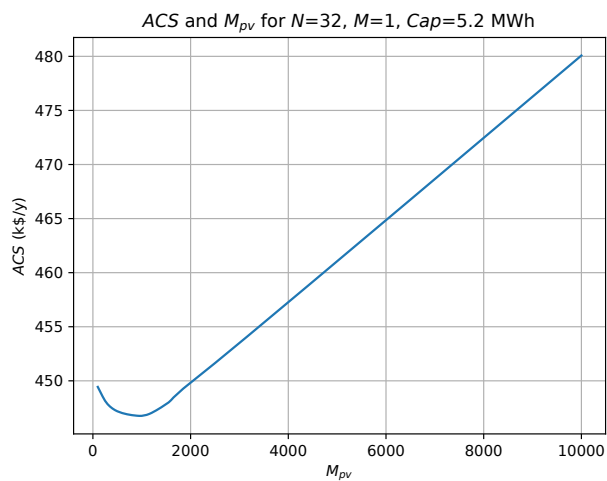

Fig. S6. Effect of number of PV modules  $M_{pv}$  on the total annualized system cost  $ACS$ .

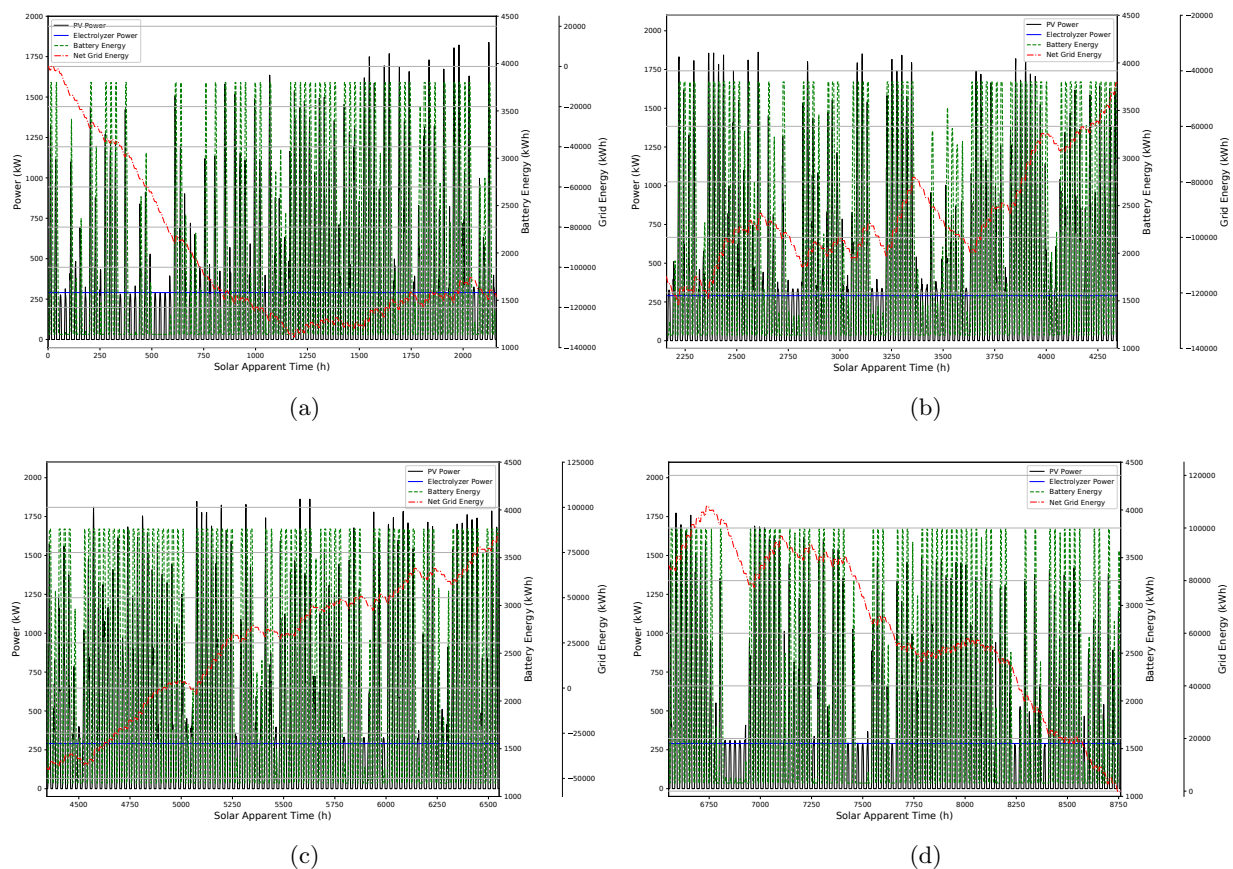

Fig. S7. Simulation results for point 77 in Table 4 for the year 2017, divided into 4 periods: January, February, March (a) April, May, June (b), July, August, September (c), and October, November, December (d).
